# Supplementary material for: Serum Starvation Accelerates Intracellular Metabolism in Endothelial Cells
Source: MDPI journal article supplement (doi:10.3390/ijms24021189), 2023-01-07
Supplement: s1 [file s1]

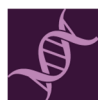

Article

# Serum starvation accelerates intracellular metabolism in endothelial cells

Mario Lorenz <sup>1,2,†</sup>, Raphaela Fritsche-Guenther <sup>3,†,\*</sup>, Cornelia Bartsch <sup>1</sup>, Angelika Vietzke <sup>1</sup>, Alina Eisenberger <sup>3</sup>, Karl Stangl <sup>1</sup>, Verena Stangl <sup>1,2,‡</sup> and Jennifer A. Kirwan <sup>3,‡</sup>

<sup>1</sup> Charité–Universitätsmedizin Berlin, corporate member of Freie Universität Berlin and Humboldt-Universität zu Berlin, Medizinische Klinik für Kardiologie und Angiologie, Campus Mitte, 10117 Berlin, Germany

<sup>2</sup> DZHK (German Centre for Cardiovascular Research), partner site Berlin, 10785 Berlin, Germany

<sup>3</sup> Metabolomics Platform, Berlin Institute of Health at Charité – Universitätsmedizin Berlin, 10117 Berlin, Germany

\* Correspondence: raphaela.fritsche@bih-charite.de

† These authors contributed equally to this work.

‡ These authors contributed equally to this work.

## Supplementary material contains the following information:

**Supplemental Table S1.** List of metabolites and their corresponding derivatives and the biological groups used for reference search. AA: Amino acids; TCA: Tricarboxylic acid cycle; TMS: Trimethylsilyl derivatives; MeOX: Methoxyamine hydrochloride.

**Supplemental Table S2.** Label incorporation (in %) for <sup>13</sup>C-glucose and <sup>13</sup>C-glutamine after 0 hours (background) under both experimental conditions in HUVECs from 5 different donors.

**Supplemental Table S3.** Label incorporation (in %) for <sup>13</sup>C-glucose and <sup>13</sup>C-glutamine after 3 hours under both experimental conditions in HUVECs from 5 different donors.

**Supplemental Table S4.** Mass pairs (mass fragment m/z) analyzed after <sup>13</sup>C-glucose or <sup>13</sup>C-glutamine labeling of HUVEC.

**Supplemental Figure S1.** Levels of detected central carbon metabolites. Shown are the log2 scaled calculated ratio of serum starved to basal cells. Significance was calculated using the Mann-Whitney-U test. Significant values p < 0.05 (\*), p < 0.01 (\*\*). TCA: tricarboxylic acid cycle.

**Supplemental Figure S2.** Incorporation of central carbon metabolites after labeling in the presence of <sup>13</sup>C-glucose (A) or <sup>13</sup>C-glutamine (B) for the indicated time points.

**Supplemental Figure S3.** Incorporation of central carbon metabolites after labeling in the presence of <sup>13</sup>C-glucose (A) or <sup>13</sup>C-glutamine (B) for the indicated time points.

**Supplementary Figure S4.** Incorporation of central carbon metabolites after labeling in the presence of <sup>13</sup>C-glucose (A) or <sup>13</sup>C-glutamine (B) for the indicated time points.

**Supplemental Table S1.** List of metabolites and their corresponding derivatives and the biological groups used for reference search. AA: Amino acids; TCA: Tricarboxylic acid cycle; TMS: Trimethylsilyl derivatives; MeOX: Methoxyamine hydrochloride.

| Group      | Metabolite                 | detected as      |
|------------|----------------------------|------------------|
| AA         | Alanine                    | 2TMS, 3TMS       |
| AA         | $\beta$ -Alanine           | 2TMS, 3TMS       |
| AA         | Asparagine                 | 2TMS             |
| AA         | Aspartic acid              | 2TMS, 3TMS       |
| AA         | Glycine                    | 2TMS, 3TMS       |
| AA         | Isoleucine                 | 1TMS, 2TMS       |
| AA         | Leucine                    | 1TMS, 2TMS       |
| AA         | Lysine                     | 3TMS             |
| AA         | Methionine                 | 1TMS, 2TMS       |
| AA         | Phenylalanine              | 1TMS, 2TMS       |
| AA         | Proline                    | 1TMS, 2TMS       |
| AA         | Serine                     | 2TMS, 3TMS, 4TMS |
| AA         | Threonine                  | 2TMS, 3TMS       |
| AA         | Tyrosine                   | 3TMS             |
| AA         | Valine                     | 1TMS, 2TMS       |
| Glycerol   | Dihydroxyacetone phosphate | 1MeOX(3TMS)      |
| Glycerol   | Glycerol                   | 3TMS             |
| Glycerol   | Glycerol-3-phosphate       | 4TMS             |
| Glycolysis | Glyceric-acid-3-phosphate  | 4TMS             |
| Glycolysis | Lactic acid                | 2TMS             |
| Glycolysis | Phosphoenolpyruvic acid    | 3TMS             |
| Glycolysis | Pyruvic acid               | 1MeOX(1TMS)      |
| TCA        | Citric acid                | 4TMS             |
| TCA        | Fumaric acid               | 2TMS             |
| TCA        | alpha-Ketoglutaric acid    | 1MeOX(2TMS)      |
| TCA        | Malic acid                 | 3TMS             |
| TCA        | Succinic acid              | 2TMS             |

**Supplemental Table S2.** Label incorporation (in %) for  $^{13}\text{C}$ -glucose and  $^{13}\text{C}$ -glutamine after 0 h (background) under both experimental conditions in HUVECs from 5 different donors.

|                           |  | $^{13}\text{C}$ -glucose labeling |     |     |     |     |         |      |      |      |      |
|---------------------------|--|-----------------------------------|-----|-----|-----|-----|---------|------|------|------|------|
| HUVEC No.                 |  | 1                                 | 2   | 3   | 4   | 5   | 1       | 2    | 3    | 4    | 5    |
| Condition                 |  | basal                             |     |     |     |     | starved |      |      |      |      |
| Pyruvic acid              |  | 0.0                               | 0.0 | 0.6 | 1.5 | 0.4 | 1.9     | 0.0  | 1.1  | 0.6  | 0.0  |
| Glyceric-acid-3-phosphate |  | 3.8                               | 1.9 | 7.1 | 6.6 | 5.9 | 0.0     | 0.0  | 0.0  | 0.0  | 0.3  |
| Lactic acid               |  | 0.6                               | 0.6 | 0.6 | 0.6 | 0.6 | 0.7     | 0.6  | 0.7  | 0.9  | 0.6  |
| Citric acid               |  | 0.2                               | 0.3 | 0.5 | 0.1 | 0.0 | 0.0     | 0.1  | 0.0  | 0.8  | 0.4  |
| Fumaric acid              |  | 0.0                               | 0.0 | 0.2 | 0.3 | 0.1 | 0.0     | 0.0  | 0.0  | 0.1  | 0.0  |
| Succinic acid             |  | 0.0                               | 0.4 | 0.0 | 0.0 | 0.0 | 0.2     | 0.0  | 0.0  | 0.0  | 0.0  |
| alpha-Ketoglutaric acid   |  | 4.5                               | 7.3 | 9.7 | 6.4 | 6.4 | 5.5     | 18.5 | 22.1 | 14.8 | 13.5 |
| Malic acid                |  | 0.0                               | 0.0 | 0.4 | 0.0 | 0.5 | 0.0     | 0.3  | 0.0  | 0.4  | 0.0  |
| Alanine                   |  | 0.5                               | 0.4 | 0.4 | 0.3 | 0.5 | 0.4     | 0.5  | 0.4  | 0.2  | 0.1  |
| Glycerol                  |  | 4.4                               | 4.4 | 4.6 | 4.5 | 4.7 | 5.1     | 5.6  | 4.7  | 4.3  | 4.8  |
| Phosphoenolpyruvic acid   |  | 0.0                               | 0.0 | 0.0 | 2.1 | 7.4 | 17.3    | 10.4 | 5.2  | 9.1  | 0.0  |

  

|                         |  | $^{13}\text{C}$ -glutamine labeling |     |     |     |    |         |     |     |       |    |
|-------------------------|--|-------------------------------------|-----|-----|-----|----|---------|-----|-----|-------|----|
| HUVEC No.               |  | 1                                   | 2   | 3   | 4   | 5  | 1       | 2   | 3   | 4     | 5  |
| Condition               |  | basal                               |     |     |     |    | starved |     |     |       |    |
| Citric acid oxy         |  | 0.4                                 | 0.0 | 0.2 | 0.9 | NA | 0.2     | 0.6 | 0.5 | 0.583 | NA |
| Citric acid red         |  | 0.3                                 | 0.1 | 0.1 | 0.5 | NA | 0.1     | 0.2 | 0.1 | 0.158 | NA |
| Fumaric acid            |  | 0.0                                 | 0.1 | 0.1 | 0.3 | NA | 0.1     | 0.1 | 0.7 | 0.096 | NA |
| Succinic acid           |  | NA                                  | NA  | 0.1 | 0.0 | NA | 0.2     | 0.0 | 0.1 | 0.000 | NA |
| alpha-Ketoglutaric acid |  | 1.5                                 | 0.8 | NA  | 0.0 | NA | 1.7     | 1.2 | 2.3 | 4.351 | NA |
| Malic acid              |  | 0.1                                 | 0.0 | 0.0 | 0.1 | NA | 0.0     | 0.0 | 0.0 | 0.349 | NA |

NA: not available due to misinjections.

**Supplemental Table S3.** Label incorporation (in %) for  $^{13}\text{C}$ -glucose and  $^{13}\text{C}$ -glutamine after 3 h under both experimental conditions in HUVECs from 5 different donors.

| HUVEC No.<br>Condition    | $^{13}\text{C}$ -glucose labeling |      |      |      |    |         |      |      |      |      |
|---------------------------|-----------------------------------|------|------|------|----|---------|------|------|------|------|
|                           | 1                                 | 2    | 3    | 4    | 5  | 1       | 2    | 3    | 4    | 5    |
|                           | basal                             |      |      |      |    | Starved |      |      |      |      |
| Pyruvic acid              | 28.4                              | 24.7 | 26.9 | 25.5 | NA | 61.3    | 65.2 | 65.3 | 67.4 | 66.7 |
| Glyceric-acid-3-phosphate | 45.1                              | 21.3 | 42.7 | 43.8 | NA | 22.4    | 32.1 | 67.3 | 84.1 | 58.8 |
| Lactic acid               | 27.0                              | 21.5 | 24.9 | 20.3 | NA | 58.8    | 55.9 | 62.1 | 60.9 | 60.7 |
| Citric acid               | 19.7                              | 16.2 | 19.8 | 15.7 | NA | 34.5    | 43.7 | 37.2 | 45.7 | 41.9 |
| Fumaric acid              | 8.3                               | 6.9  | 8.9  | 7.3  | NA | 11.7    | 14.2 | 11.6 | 16.0 | 13.6 |
| Succinic acid             | 1.4                               | 0.9  | 1.2  | 0.5  | NA | 6.0     | 9.3  | 6.9  | 10.4 | 5.6  |
| alpha-Ketoglutaric acid   | Out                               | 18.5 | 16.8 | 16.7 | NA | 22.2    | 22.2 | 24.2 | 20.8 | 23.3 |
| Malic acid                | 6.9                               | 6.3  | 8.2  | 7.0  | NA | 11.7    | 14.8 | 13.2 | 15.6 | 15.4 |
| Alanine                   | 5.5                               | 2.7  | 3.3  | 2.2  | NA | 4.9     | 9.7  | 3.5  | 3.4  | 3.0  |
| Glycerol                  | 5.9                               | 4.9  | 5.5  | 5.5  | NA | 6.9     | 6.2  | 4.8  | 5.2  | 5.1  |
| Phosphoenolpyruvic acid   | 32.3                              | NA   | 21.9 | NA   | NA | 75.4    | 58.7 | 53.3 | 51.5 | 43.7 |

  

| HUVEC No.<br>Condition  | $^{13}\text{C}$ -glutamine labeling |      |      |      |      |         |      |      |      |      |
|-------------------------|-------------------------------------|------|------|------|------|---------|------|------|------|------|
|                         | 1                                   | 2    | 3    | 4    | 5    | 1       | 2    | 3    | 4    | 5    |
|                         | basal                               |      |      |      |      | Starved |      |      |      |      |
| Citric acid oxy         | 15.1                                | 14.3 | 9.3  | 13.1 | 12.3 | 26.7    | 28.9 | 19.1 | 25.3 | 21.8 |
| Citric acid red         | 4.3                                 | 4.1  | 2.7  | 3.6  | 3.5  | 9.9     | 12.2 | 6.3  | 9.8  | 7.5  |
| Fumaric acid            | 17.9                                | 20.1 | 10.6 | 17.7 | 16.1 | 23.6    | 30.6 | 16.3 | 23.8 | 21.9 |
| Succinic acid           | 2.4                                 | 2.2  | 0.9  | 2.0  | 1.7  | 12.7    | 19.2 | 10.0 | 14.6 | 9.8  |
| alpha-Ketoglutaric acid | 26.4                                | 27.1 | 19.5 | 25.2 | 26.7 | 21.0    | 30.4 | 18.0 | 24.1 | 22.1 |
| Malic acid              | 20.1                                | 21.0 | 11.8 | 18.6 | 16.6 | 26.7    | 31.1 | 18.3 | 25.1 | 24.7 |

NA: not available due to misinjections. Out: Significant outlier analyzed with Grubbs test (<https://www.graphpad.com/quickcalcs/Grubbs1.cfm>).

**Supplemental Table S4.** Mass pairs (mass fragment m/z) analyzed after  $^{13}\text{C}$ -glucose or  $^{13}\text{C}$ -glutamine labeling of HUVEC.

| Metabolite                | Unlabeled | Labeling with $^{13}\text{C}$ -glucose | Labeling with $^{13}\text{C}$ -glutamine |
|---------------------------|-----------|----------------------------------------|------------------------------------------|
| Glycerol                  | 218       | 221                                    | -                                        |
| Alanine                   | 188       | 190                                    | -                                        |
| Citric acid               | 273       | 275                                    | 277                                      |
| Fumaric acid              | 245       | 247                                    | 249                                      |
| Glyceric-acid-3-phosphate | 357       | 359                                    | -                                        |
| alpha-Ketoglutaric acid   | 200       | 202                                    | 204                                      |
| Lactic acid               | 117       | 119                                    | -                                        |
| Malic acid                | 233       | 235                                    | 236                                      |
| Phosphoenolpyruvic acid   | 369       | 372                                    | -                                        |
| Pyruvic acid              | 174       | 177                                    | -                                        |
| Succinic acid             | 247       | 249                                    | 251                                      |

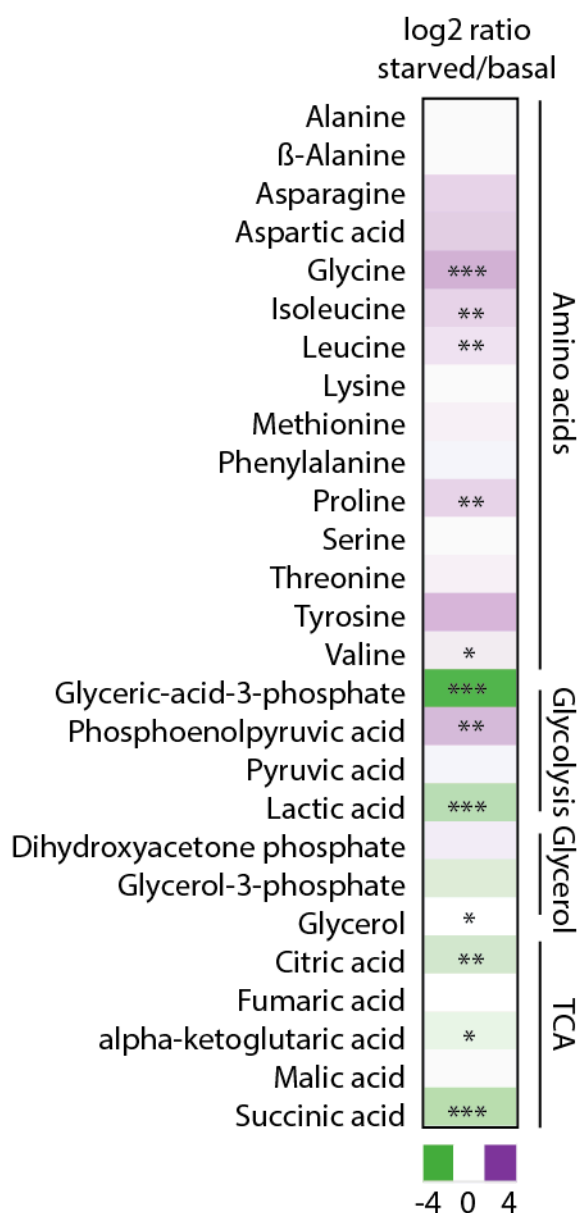

**Supplemental Figure S1.** Levels of detected central carbon metabolites. Shown are the log2 scaled calculated ratio of serum starved to basal cells. Cells were harvested after 3 h. Significance was calculated using the Mann-Whitney-U test. Significant values  $p < 0.05$  (\*),  $p < 0.01$  (\*\*) or  $p < 0.001$  (\*\*\*). TCA: tricarboxylic acid cycle.

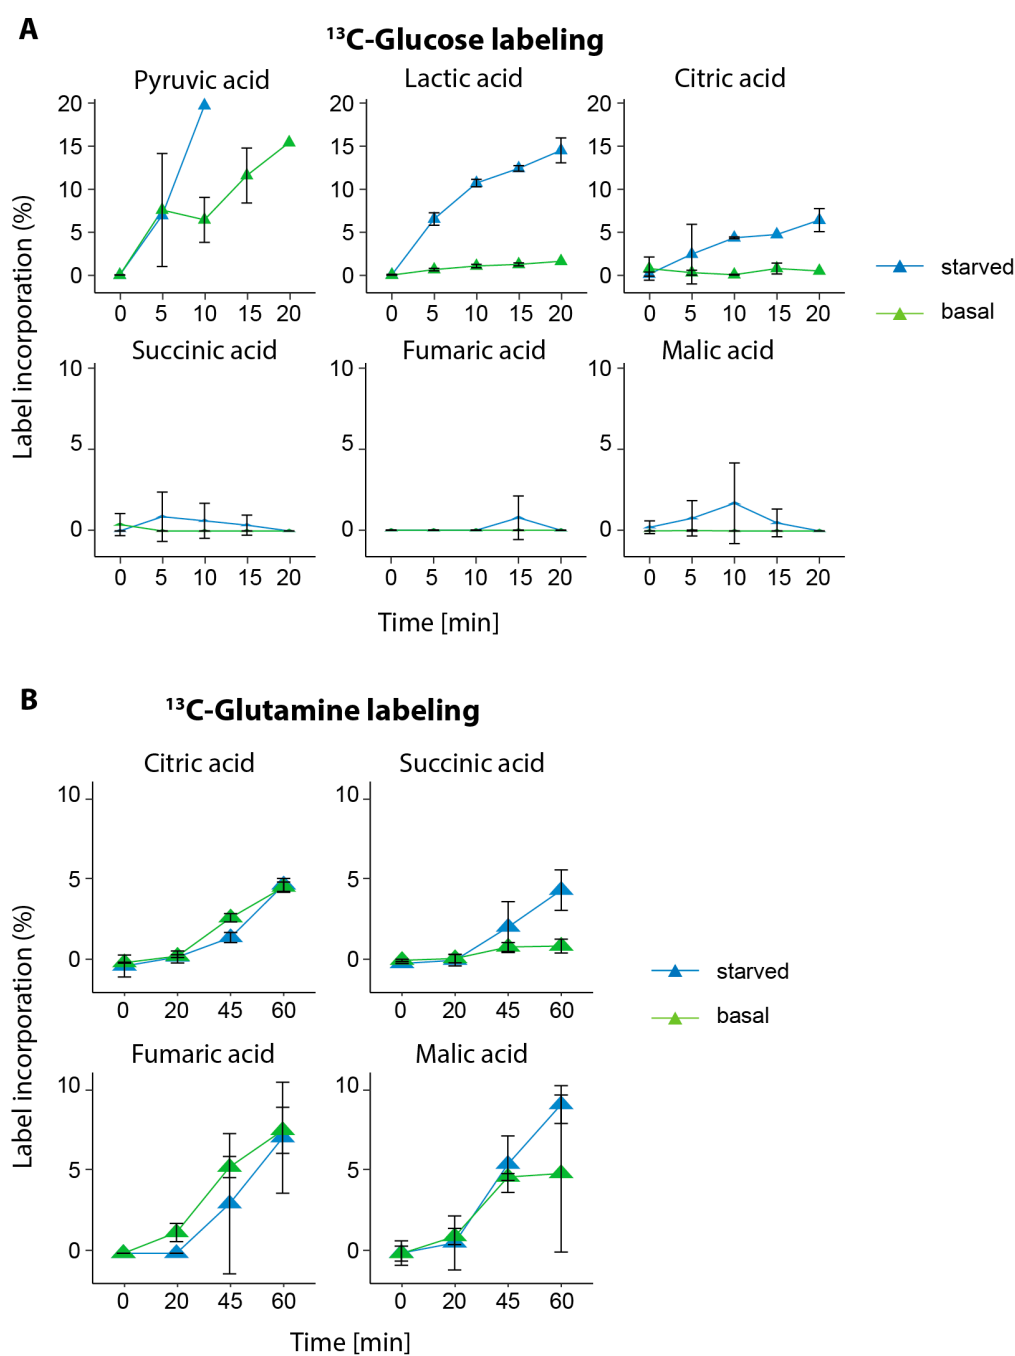

**Supplemental Figure S2.** Incorporation of central carbon metabolites after labeling in the presence of <sup>13</sup>C-glucose (A) or <sup>13</sup>C-glutamine (B) for the indicated time points.

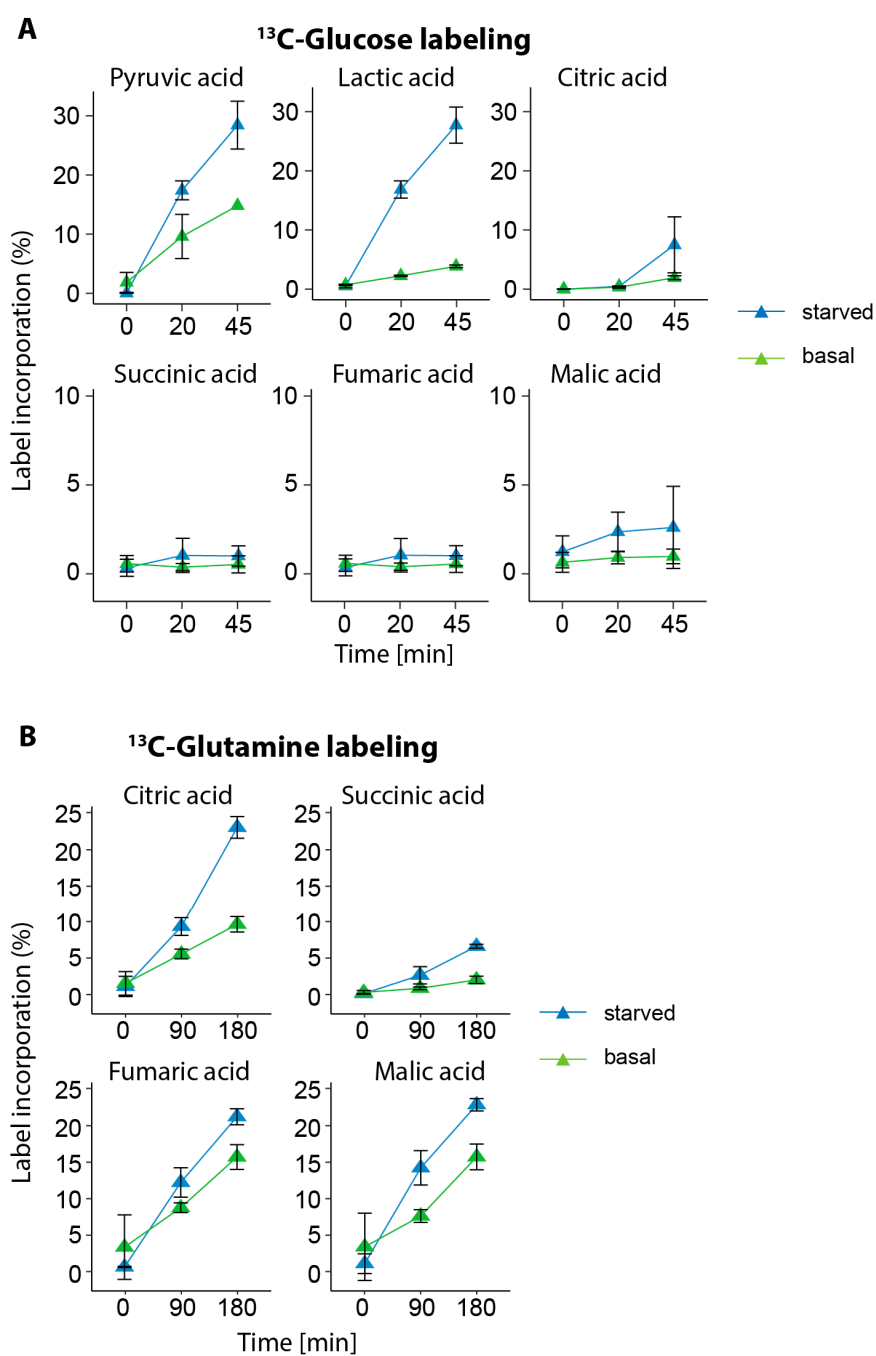

**Supplemental Figure S3.** Incorporation of central carbon metabolites after labeling in the presence of <sup>13</sup>C-glucose (A) or <sup>13</sup>C-glutamine (B) for the indicated time points.

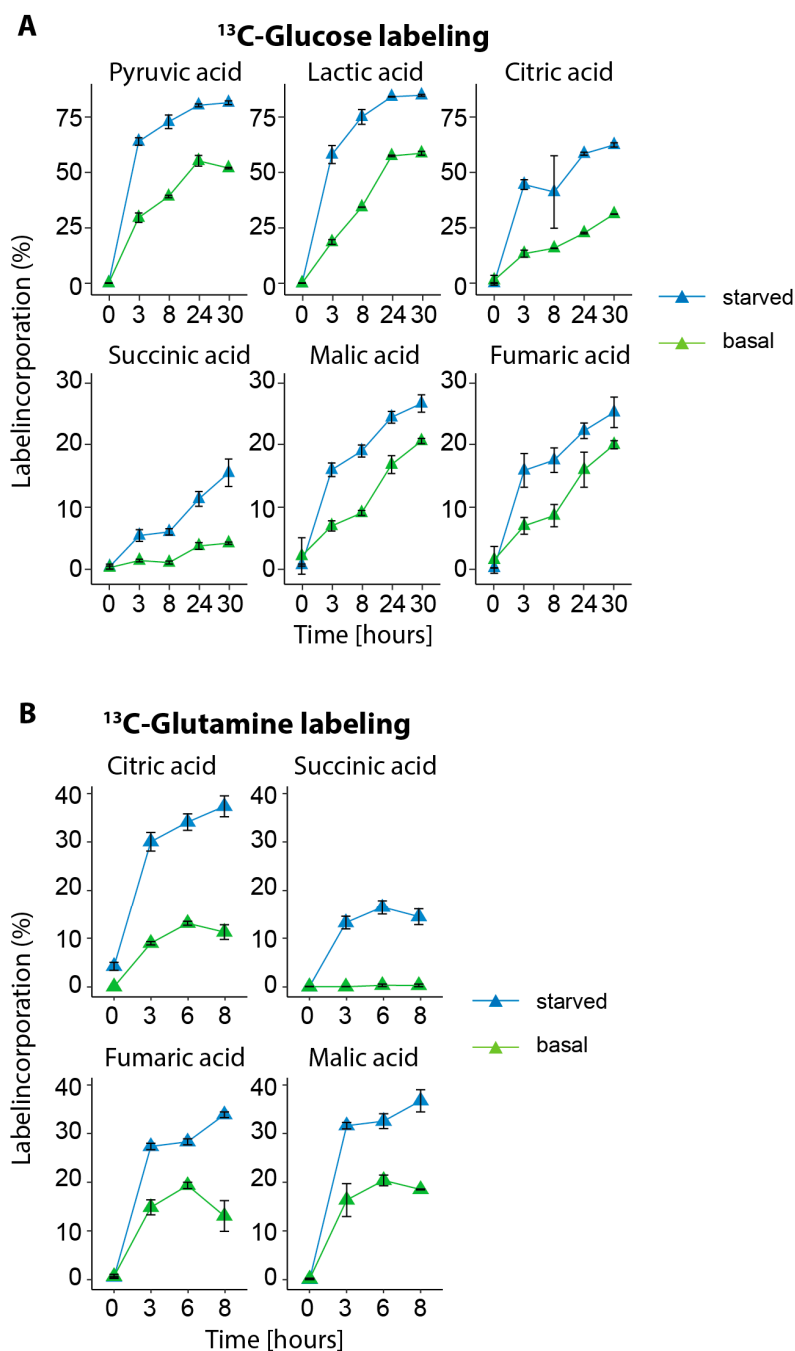

**Supplementary Figure S4.** Incorporation of central carbon metabolites after labeling in the presence of <sup>13</sup>C-glucose (A) or <sup>13</sup>C-glutamine (B) for the indicated time points.
